# Supplementary material for: Atomic-scale stress modulation of nanolaminate for micro-LED encapsulation
Source: Royal Society of Chemistry journal article supplement (doi:10.1039/d3nr06169h), 2024-01-01
Supplement: d3nr06169h1.pdf [file d3nr06169h1.pdf]

## Supporting Information

### Atomic-Scale Stress Modulation of Nanolaminate for Micro-LED

#### Encapsulation

Di Wen<sup>‡1</sup>, Jiacheng Hu<sup>‡1</sup>, Ruige Yuan<sup>1</sup>, Wang Li<sup>1</sup>, Kun Cao<sup>\*1</sup>, Rong Chen<sup>\*1</sup>

<sup>1</sup>State Key Laboratory of Intelligent Manufacturing Equipment and Technology, School of Mechanical Science and Engineering, Huazhong University of Science and Technology, Wuhan 430074, Hubei, People's Republic of China.

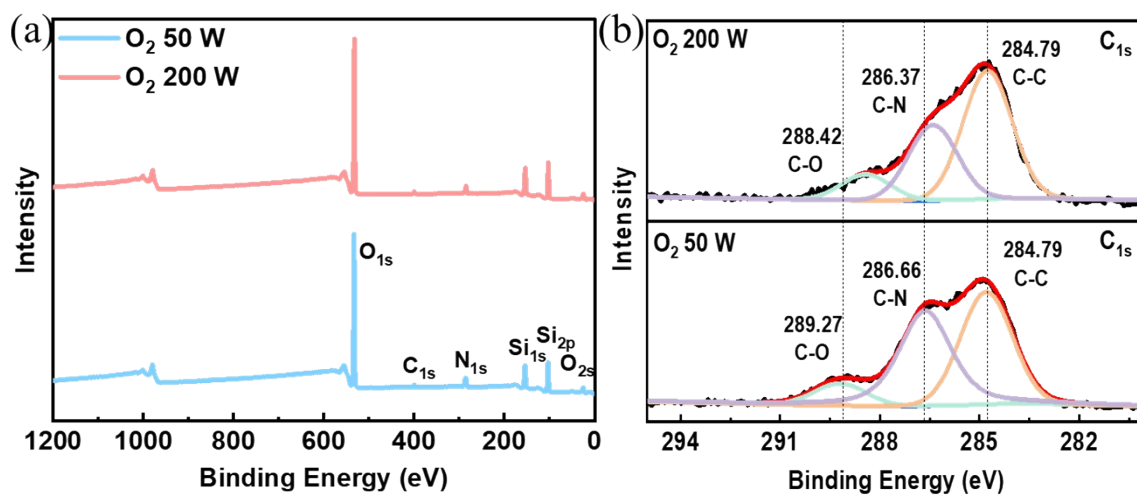

Figure S1. XPS spectra of SiO<sub>2</sub> film with various plasma power. (a) full spectrum. (b) C 1s.

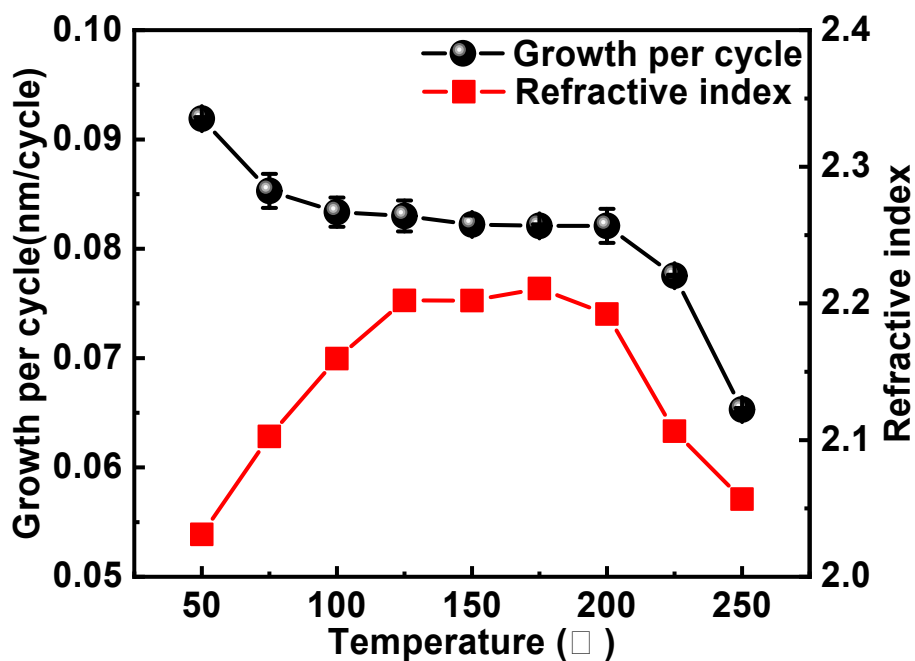

Figure S2. The effect of temperature on the growth per cycle and refractive index of SiO<sub>2</sub> thin film

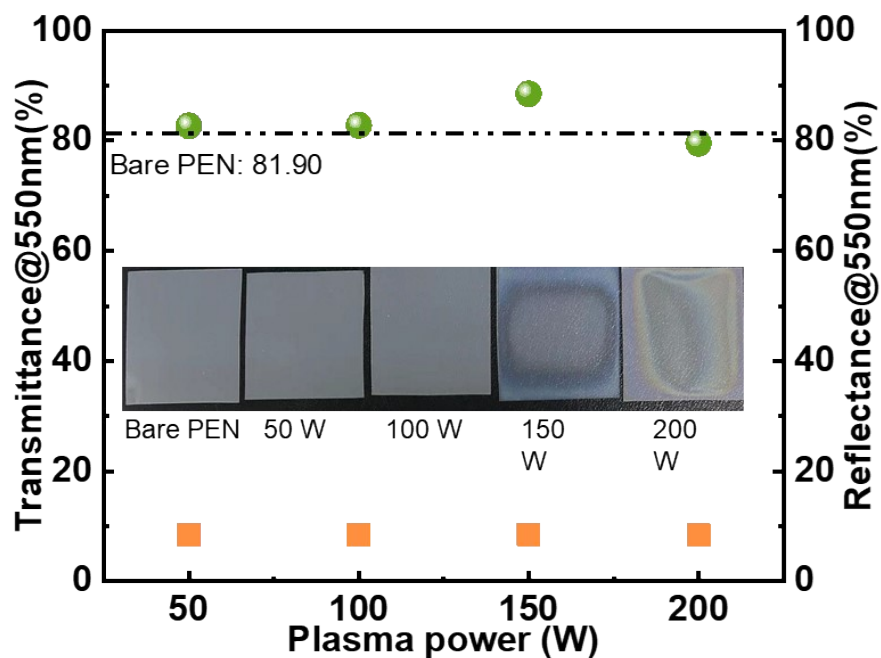

Figure S3. The effect of plasma power on the transmittance and reflectance of SiO<sub>2</sub> thin film

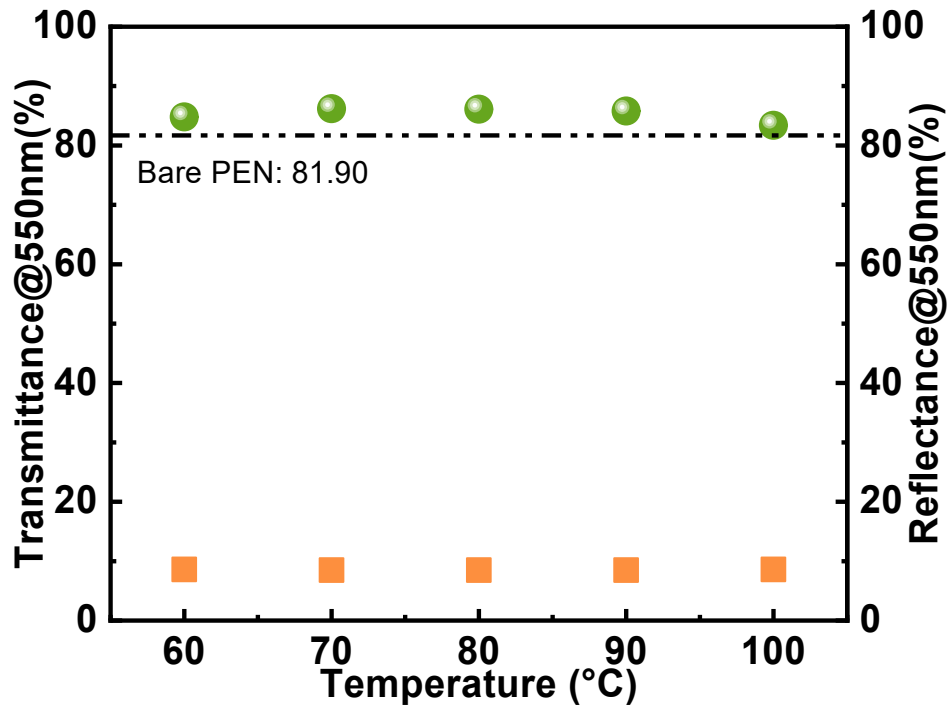

Figure S4. The effect of temperature on the transmittance and reflectance of SiO<sub>2</sub> thin film

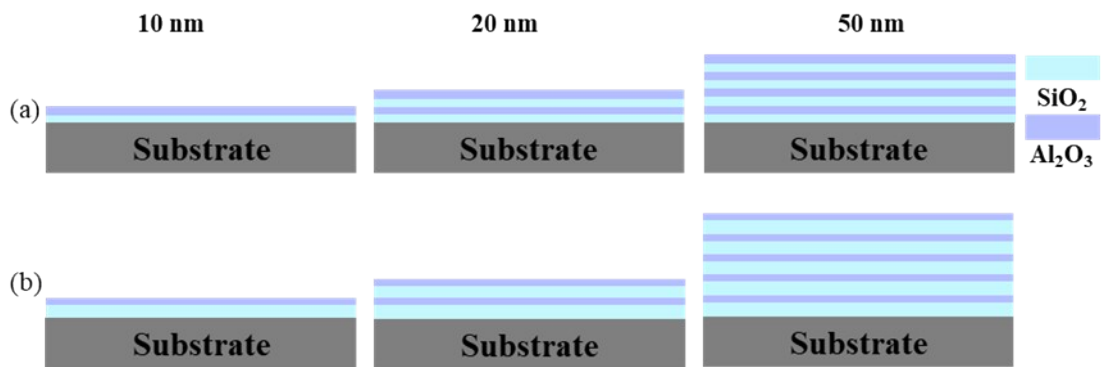

Figure S5. The structure of the nanolaminate with different pairs order. (a) SA<sub>1/1</sub>. (b) SA<sub>2/1</sub>

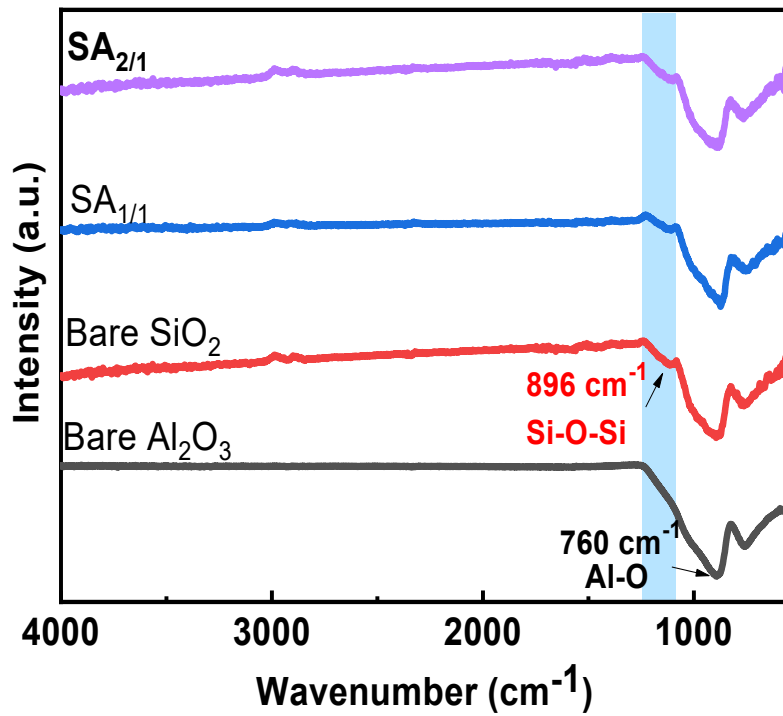

Figure S6. FTIR spectra of thin film (T-ALD Al<sub>2</sub>O<sub>3</sub>, PE-SiO<sub>2</sub>, SA<sub>1/1</sub> and SA<sub>2/1</sub>).

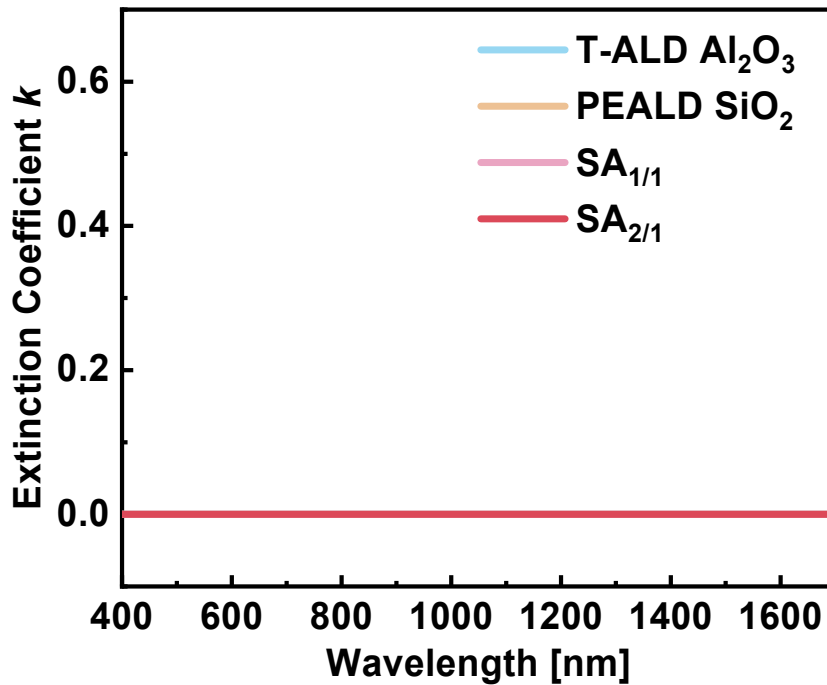

Figure S7. The extinction coefficient  $\kappa$  of SiO<sub>2</sub>, Al<sub>2</sub>O<sub>3</sub> thin film, SA<sub>1/1</sub>, and SA<sub>2/1</sub>

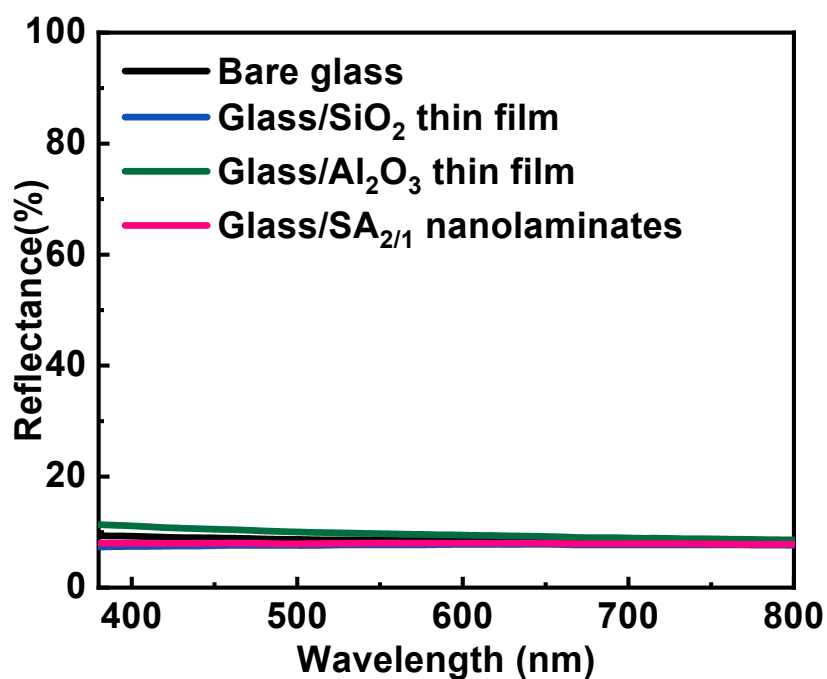

Figure S8. The reflectance of SiO<sub>2</sub>, Al<sub>2</sub>O<sub>3</sub> and SA<sub>2/1</sub> thin film

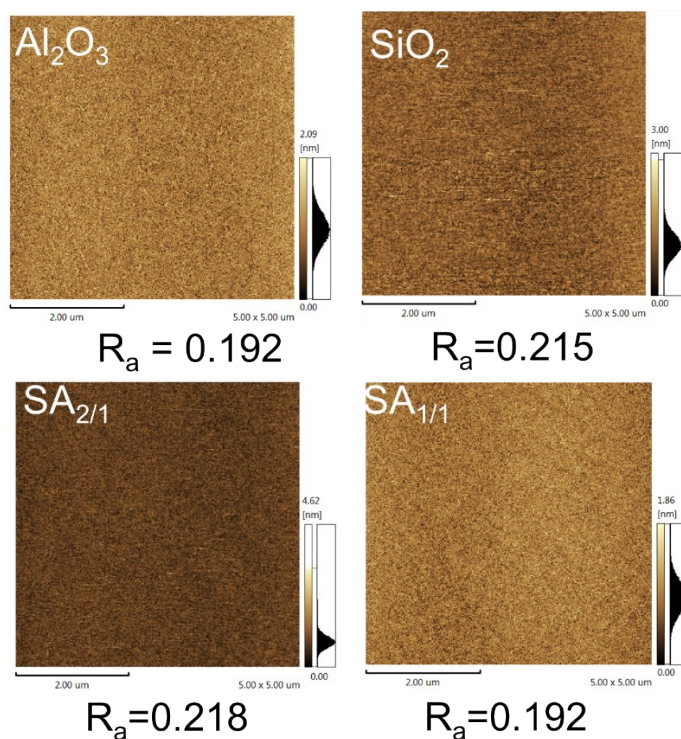

Figure S9. AFM of thin films. (a) SiO<sub>2</sub>. (b) Al<sub>2</sub>O<sub>3</sub> thin film. (c) SA<sub>2/1</sub> and (c) SA<sub>1/1</sub>.

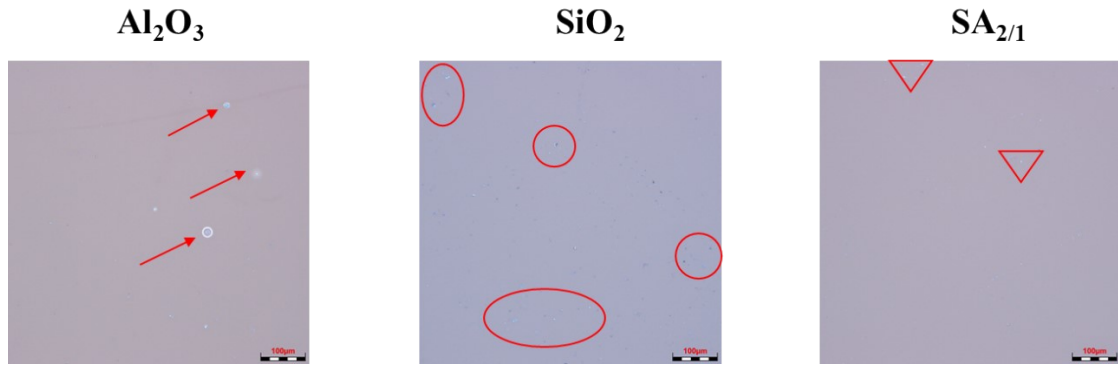

Figure S10. Ultra-depth 3D microscope image of thin films after aging condition (60°C/90% RH).

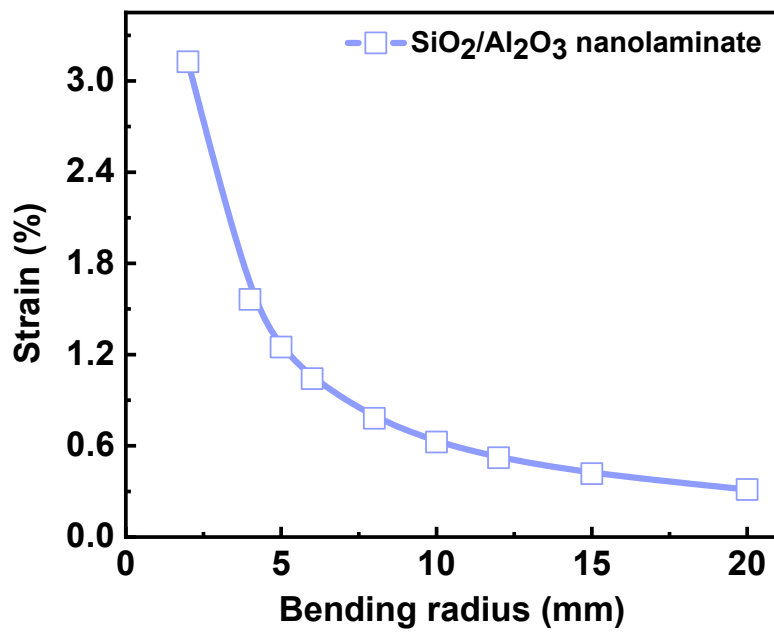

Figure S11. The correlation of the strain and bending radius.

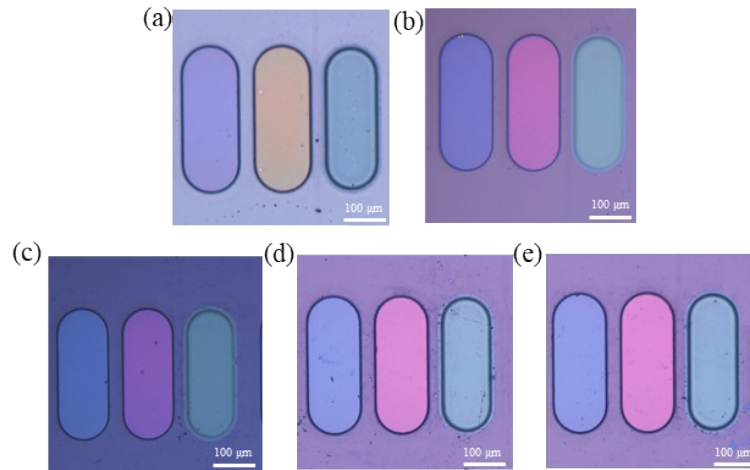

Figure S12. Ultra-depth 3D microscope image of (a) bare Micro-LED and Micro-LED with encapsulation of (b) PE-ALD-SiO<sub>2</sub>. (c) T-ALD-Al<sub>2</sub>O<sub>3</sub>. (d) SA<sub>1/1</sub>. and (e) SA<sub>2/1</sub>

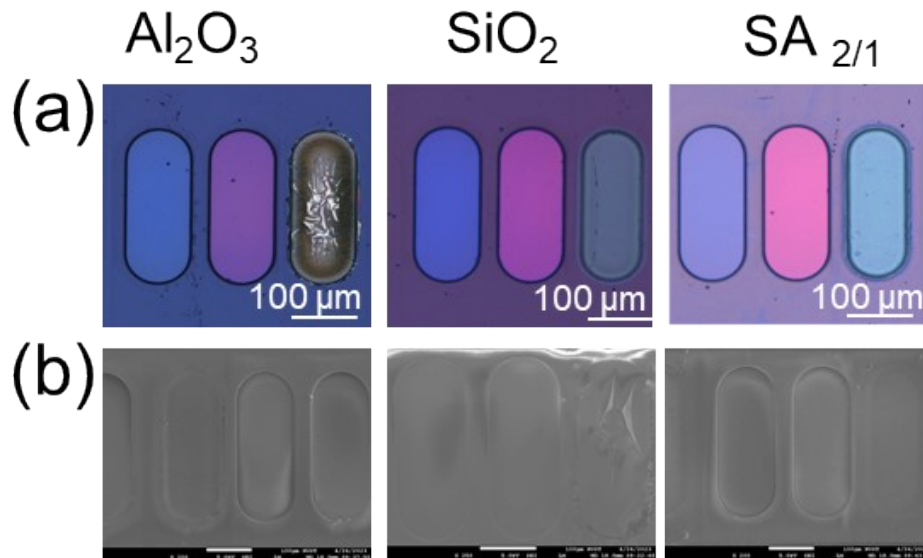

Figure S13. Ultra-depth 3D microscope image including bright field and SEM image for encapsulated Micro-LED after the deposition of 15 nm T-ALD Al<sub>2</sub>O<sub>3</sub>.

Table 1 Comparison with other literature on the residual stress of thin films

|            | Material                                                                           | Process                                                                          | Precursor                                                            | Process temperature (°C)                              | Thickness (nm) | Residual stress (MPa) | Ref.      |
|------------|------------------------------------------------------------------------------------|----------------------------------------------------------------------------------|----------------------------------------------------------------------|-------------------------------------------------------|----------------|-----------------------|-----------|
|            | SiO <sub>2</sub> /Al <sub>2</sub> O <sub>3</sub>                                   | PEALD /ALD                                                                       | TDMAS, O <sub>2</sub> plasma; TMA, O <sub>2</sub>                    | 100                                                   | 10/20/50       | <5                    | This work |
|            | Polysilicon                                                                        | CVD /annealing                                                                   | SiH <sub>4</sub>                                                     | >1000                                                 | 2000           | 5                     | 1         |
| Mono-layer | SiN <sub>x</sub>                                                                   | PECVD                                                                            | SiH <sub>4</sub> , NH <sub>3</sub> , N <sub>2</sub>                  | 300                                                   | —              | 4                     | 2         |
|            | Ir                                                                                 | MS                                                                               | Ir                                                                   | —                                                     | 15.8           | -2.89                 | 3         |
|            | SiN <sub>x</sub> H <sub>y</sub>                                                    | PECVD                                                                            | SiH <sub>4</sub> , NH <sub>3</sub> , N <sub>2</sub>                  | 125                                                   | 680            | 5.1                   | 4         |
|            | Al <sub>2</sub> O <sub>3</sub>                                                     | ALD                                                                              | TMA, O <sub>3</sub> /H <sub>2</sub> O                                | 500                                                   | 60             | 50                    | 5         |
|            | Al <sub>2</sub> O <sub>3</sub>                                                     | ALD                                                                              | TMA, H <sub>2</sub> O                                                | 300                                                   | 100            | 180                   | 6         |
|            | TiO <sub>2</sub>                                                                   | ALD                                                                              | TDMAT, H <sub>2</sub> O                                              | 40                                                    | 30             | 40                    | 7         |
|            |                                                                                    | Al <sub>2</sub> O <sub>3</sub> /TiO <sub>2</sub> /pV <sub>3</sub> D <sub>3</sub> | ALD /iCVD                                                            | TMA, H <sub>2</sub> O/ TDMAT, H <sub>2</sub> O; PV3D3 | 300/40/—       | 115                   | ~50       |
|            | HfO <sub>2</sub> /SiO <sub>2</sub>                                                 | PEALD                                                                            | TDMAH, O <sub>2</sub> plasma/BDEAS, O <sub>2</sub> plasma            | 100/50                                                | 2300           | 120                   | 8         |
| Multi-film | SiO <sub>x</sub> N <sub>y</sub> /SiO <sub>2</sub> /SiO <sub>x</sub> N <sub>y</sub> | PECVD /PEALD                                                                     | SiH <sub>4</sub> , mixture gas plasma/DIPAS, N <sub>2</sub> O plasma | 80                                                    | 1000           | -72                   | 9         |
|            | HfO <sub>2</sub> /Si                                                               | Evaporation                                                                      | Hf                                                                   | —                                                     | 9100           | -34.5                 | 10        |
|            | Al <sub>2</sub> O <sub>3</sub> /p(CHA-co-V <sub>3</sub> D <sub>3</sub> )           | ALD/ iCVD                                                                        | TMA, H <sub>2</sub> O; CHA, V <sub>3</sub> D <sub>3</sub> , TBPO     | 90/35                                                 | 200            | 22.5                  | 11        |
|            | Al <sub>2</sub> O <sub>3</sub> /Y <sub>2</sub> O <sub>3</sub>                      | ALD                                                                              | TMA, H <sub>2</sub> O/ Y- (CpBu) <sub>3</sub> , H <sub>2</sub> O     | 300                                                   | 83             | -40                   | 12        |
|            | Al <sub>2</sub> O <sub>3</sub> /SiO <sub>2</sub>                                   | ALD/IBS                                                                          | TMA, H <sub>2</sub> O                                                | 200                                                   | 628            | 38                    | 13        |
|            | SAOLs /Al <sub>2</sub> O <sub>3</sub>                                              | MLD/ALD                                                                          | 7- OTS, H <sub>2</sub> O/ TMA, H <sub>2</sub> O                      | 80                                                    | 152.5          | -131.1                | 14        |



## Reference

- 1 J. Yang, H. Kahn, A. Q. He, S. M. Phillips and A. H. Heuer, *J. Microelectromechanical Syst.*, 2000, **9**, 485–494.
- 2 C. Iliescu, M. Avram, B. Chen, A. Popescu, V. Dumitrescu, D. P. Poenar, A. Sterian, D. Vrtacnik, S. Amon and P. Sterian, *J. Optoelectron. Adv. Mater.*, 2011, **13**, 387–394.
- 3 D. M. Broadway, J. Weimer, D. Gurgew, T. Lis, B. D. Ramsey, S. L. O’Dell, M. Gubarev, A. Ames and R. Bruni, *EUV X-ray Opt. Synerg. between Lab. Sp. IV*, 2015, **9510**, 95100E.
- 4 B. A. Walmsley, Y. Liu, X. Z. Hu, M. B. Bush, J. M. Dell and L. Faraone, *J. Microelectromechanical Syst.*, 2007, **16**, 622–627.
- 5 G. Krautheim, T. Hecht, S. Jakschik, U. Schröder and W. Zahn, *Appl. Surf. Sci.*, 2005, **252**, 200–204.
- 6 O. M. E. Ylivaara, X. Liu, L. Kilpi, J. Lyytinen, D. Schneider, M. Laitinen, J. Julin, S. Ali, S. Sintonen, M. Berdova, E. Haimi, T. Sajavaara, H. Ronkainen, H. Lipsanen, J. Koskinen, S. P. Hannula and R. L. Puurunen, *Thin Solid Films*, 2014, **552**, 124–135.
- 7 S. Y. Jeong, H. R. Shim, Y. Na, K. S. Kang, Y. Jeon, S. Choi, E. G. Jeong, Y. C. Park, H. E. Cho, J. Lee, J. H. Kwon, S. G. Im and K. C. Choi, *npj Flex. Electron.*, 2021, **5**, 1–9.
- 8 V. Beladiya, T. Faraz, P. Schmitt, A. S. Munser, S. Schröder, S. Riese, C. Mühligh, D. Schachtler, F. Steger, R. Botha, F. Otto, T. Fritz, C. Van Helvoirt, W. M. M. Kessels, H. Gargouri and A. Szeghalmi, *ACS Appl. Mater. Interfaces*, 2022, **14**, 14677–14692.
- 9 Z. Chen, Z. Wang, Y. Zhou, J. Zhang, Z. Li, C. Li, P. Chen and Y. Duan, *Opt. Express*, 2021, **29**, 33077.
- 10 J. B. Oliver, P. Kupinski, A. L. Rigatti, A. W. Schmid, J. C. Lambropoulos, S. Papernov, A. Kozlov and R. D. Hand, *Opt. InfoBase Conf. Pap.*, 2010, 2–4.
- 11 Y. C. Park, T. Kim, H. R. Shim, Y. W. Choi, S. Hong, S. Yoo and S. G. Im,

- Appl. Surf. Sci.*, 2022, **598**, 153874.
- 12 J. P. Niemelä, B. Putz, G. Mata-Osoro, C. Guerra-Nuñez, R. N. Widmer, N. Rohbeck, T. E. J. Edwards, M. Döbeli, K. Maćkosz, A. Szkudlarek, Y. Kuzminykh, X. Maeder, J. Michler, B. Andreaus and I. Utke, *ACS Appl. Nano Mater.*, 2022, **5**, 6285.
- 13 H. Liu, L. Jensen, P. Ma and D. Ristau, *Appl. Surf. Sci.*, 2019, **476**, 521–527.
- 14 K. H. Yoon, H. S. Kim, K. S. Han, S. H. Kim, Y.-E. K. Lee, N. K. Shrestha, S. Y. Song and M. M. Sung, *ACS Appl. Mater. Interfaces*, 2017, **9**, 5399–5408.
